# Supplementary material for: Mapping DNA damage‐dependent genetic interactions in yeast via party mating and barcode fusion genetics
Source: PubMed Central journal article supplement (PMC5974512; doi:10.15252/msb.20177985), 2018-05-28
Supplement: MSB-14-e7985-s001.pdf [file MSB-14-e7985-s001.pdf]

## Expanded View Figures

### Figure EV1. Donor toolkit construction.

- A Two fragments were built to generate proDonor plasmids. The first, preD1, contained *loxP/lox2272* sites flanking two 20-bp unique barcodes and a hygromycin resistance marker. In this study, only the upstream barcode was used for further steps, and for simplification, the downstream barcode was omitted from Fig 1.
- B The second, preD2, contained the Cre recombinase driven by the doxycycline-inducible tetO-CMV, and a *URA3* marker.
- C The two fragments were assembled *in vivo* in yeast to generate pDonors.
- D pDonors were arrayed and Sanger-sequenced to confirm the integrity of the preD1 fragment. ProDonors with confirmed preD1 fragments were mated with YKO strains to generate strains carrying both a uniquely barcoded pDonor and a gene deletion of interest. Then, they were sporulated and the haploid *MAT*alpha progeny were selected using the mating type maker indicated in panel (C). Details on selective media are shown in Fig EV3.

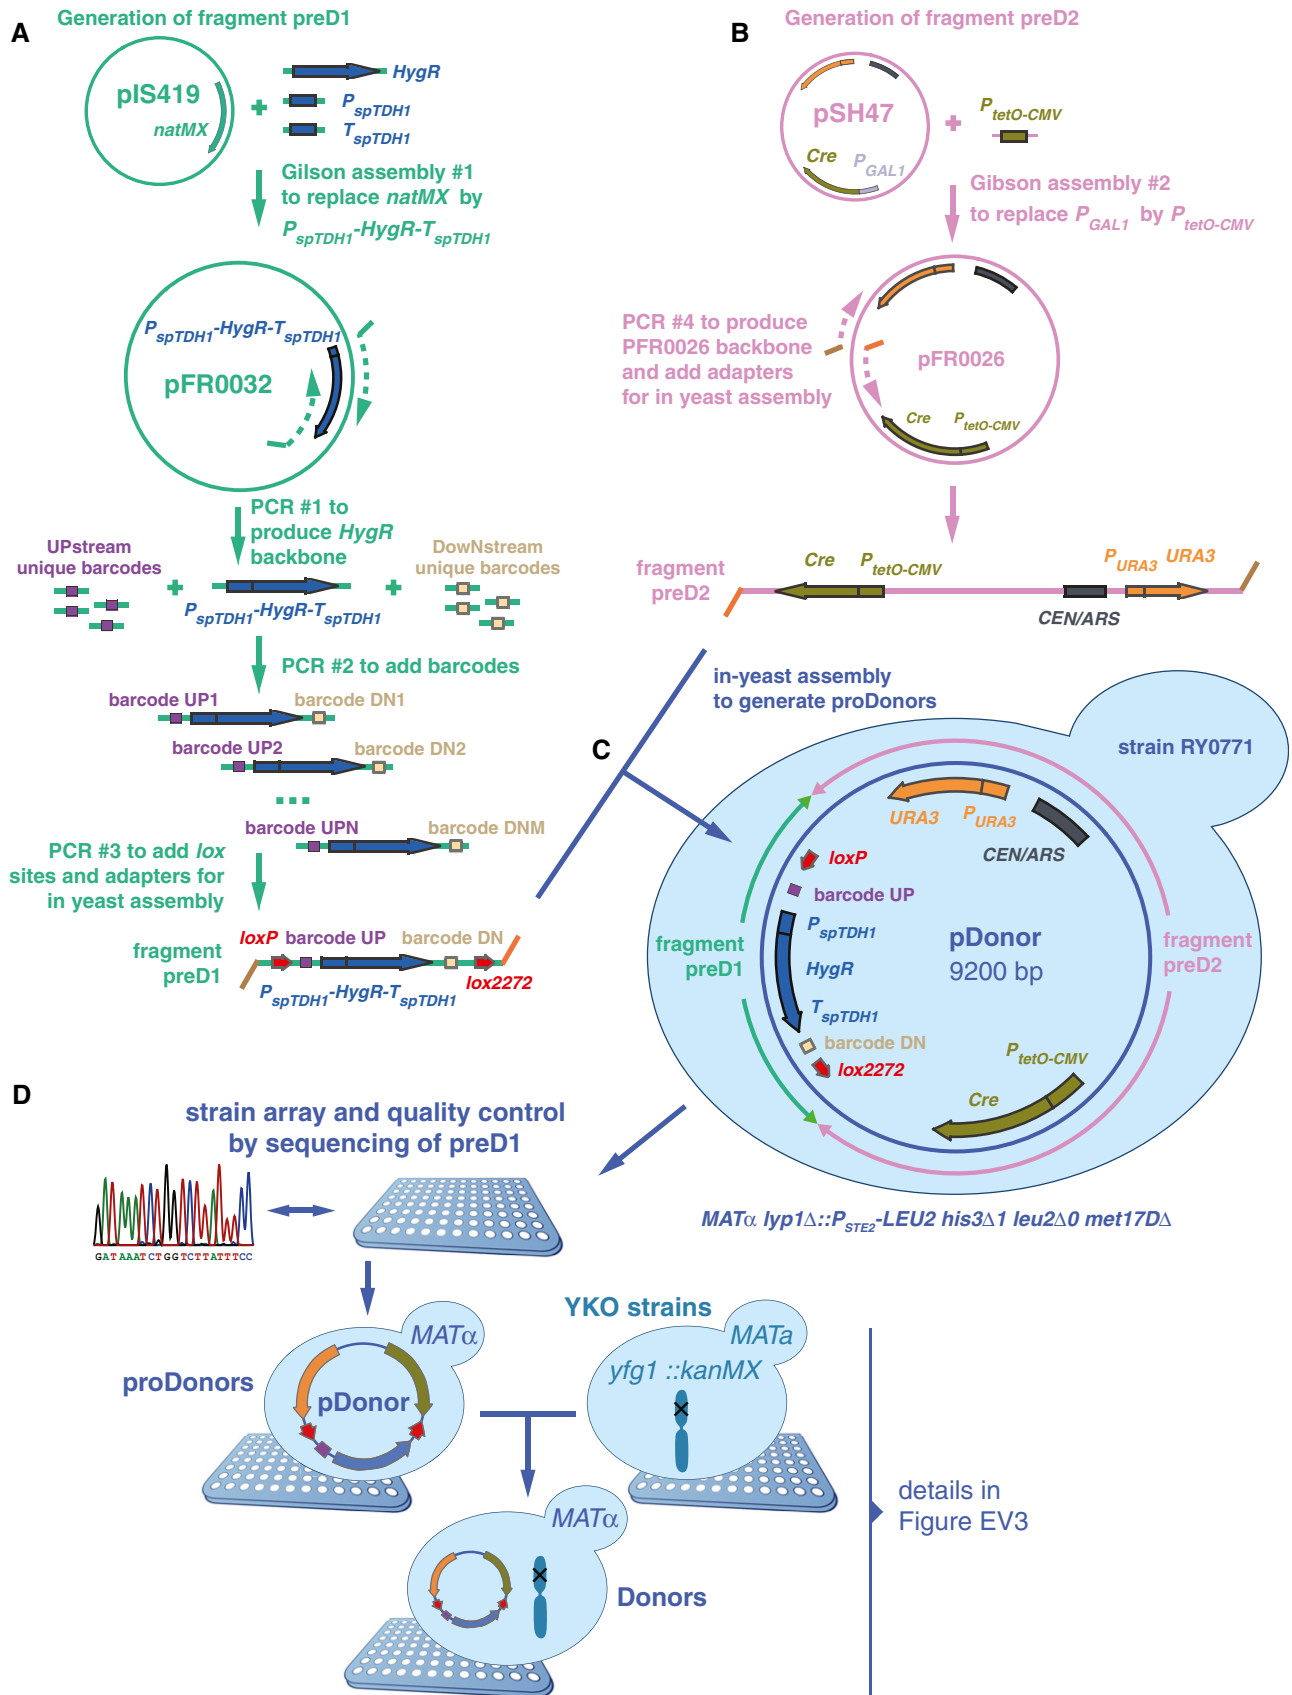

Figure EV1.

**Figure EV2. Recipient toolkit construction.**

- A Two constructs were built to generate recipients. The first fragment, preR1, contained *loxP/lox2272* sites flanking a *klURA3* marker and two 20-bp unique barcodes flanking these loci. In this study, only the upstream barcode was used for further steps, and for simplification, the downstream barcode was omitted from Fig 1.
- B The second construct, preR2, contained the *can1Δ::P<sub>STE2</sub>-spHis5-T<sub>STE2</sub>* mating type marker.
- C The two fragments were assembled *in vivo* using a derivative of the *delitto perfetto* construct.
- D Resulting proRecipients were arrayed and Sanger-sequenced to confirm integrity of preR1 loci. ProRecipients with confirmed preR1 loci were mated with SGA query strains to generate strains carrying both a uniquely barcoded recipient construct and a gene deletion of interest. Then, they were sporulated and the haploid *MATa* progeny were selected using the mating type maker indicated in panel (C). Details on selective media are shown in Fig EV3.

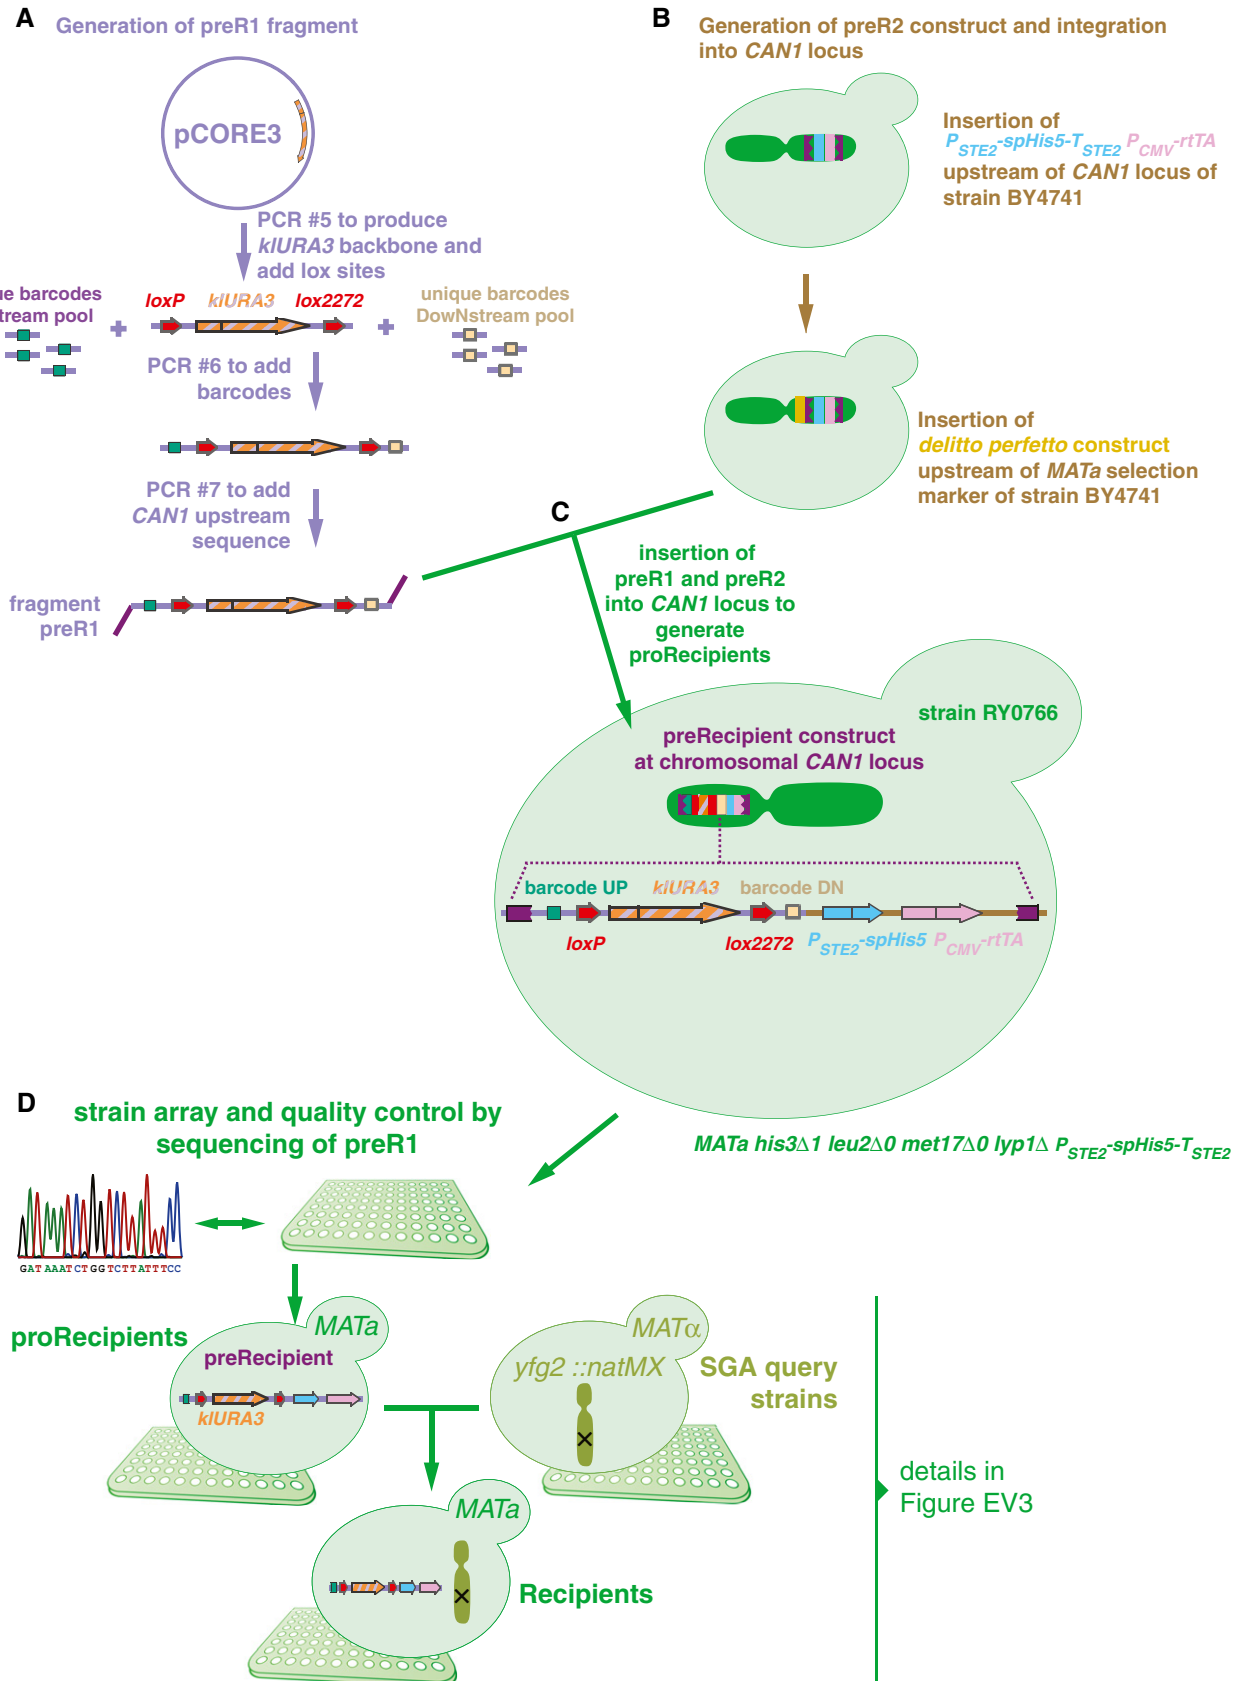

Figure EV2.

**Figure EV3. Media details to generate BFG-GI strains and pools.**

Donors, recipients, and double mutants used in BFG-GI were generated as shown in Figs 1, EV1 and EV2. This figure shows media details, optimal inoculum cell densities, and incubation times for pool-based cultures. All incubations were at 30°C for 24 h, except for mating (12 h at 23°C) and sporulation (12 days at 21°C). Sporulation was conducted in flasks with liquid media shaking at 200 rpm. We used the following reagent concentrations: G418 = 200 µg/ml; clonNat = 100 µg/ml; canavanine = 100 µg/ml; thialysine = 100 µg/ml; hygromycin = 200 µg/ml; and 5-FOA = 1 mg/ml. Amino acid concentrations were as described in Tong and Boone (2005).

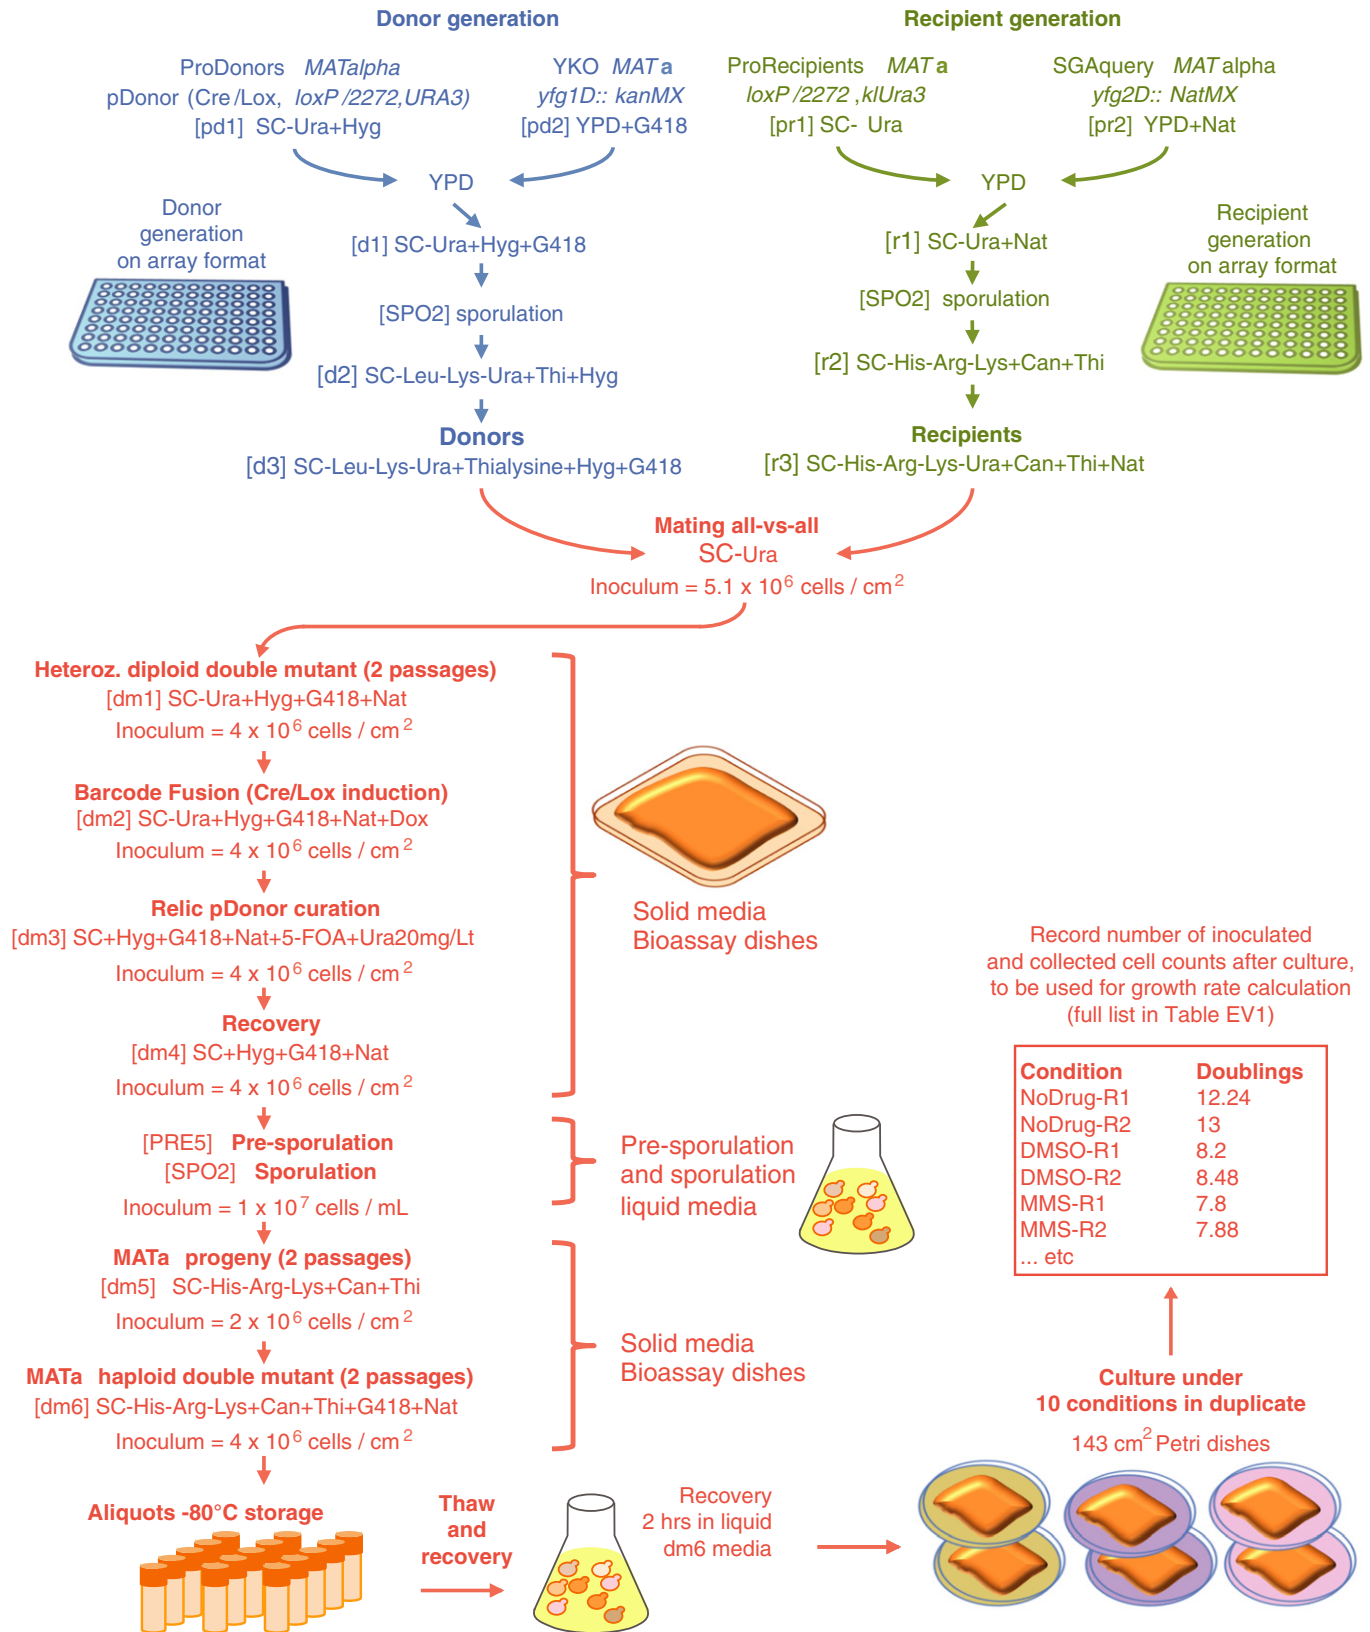

Figure EV3.

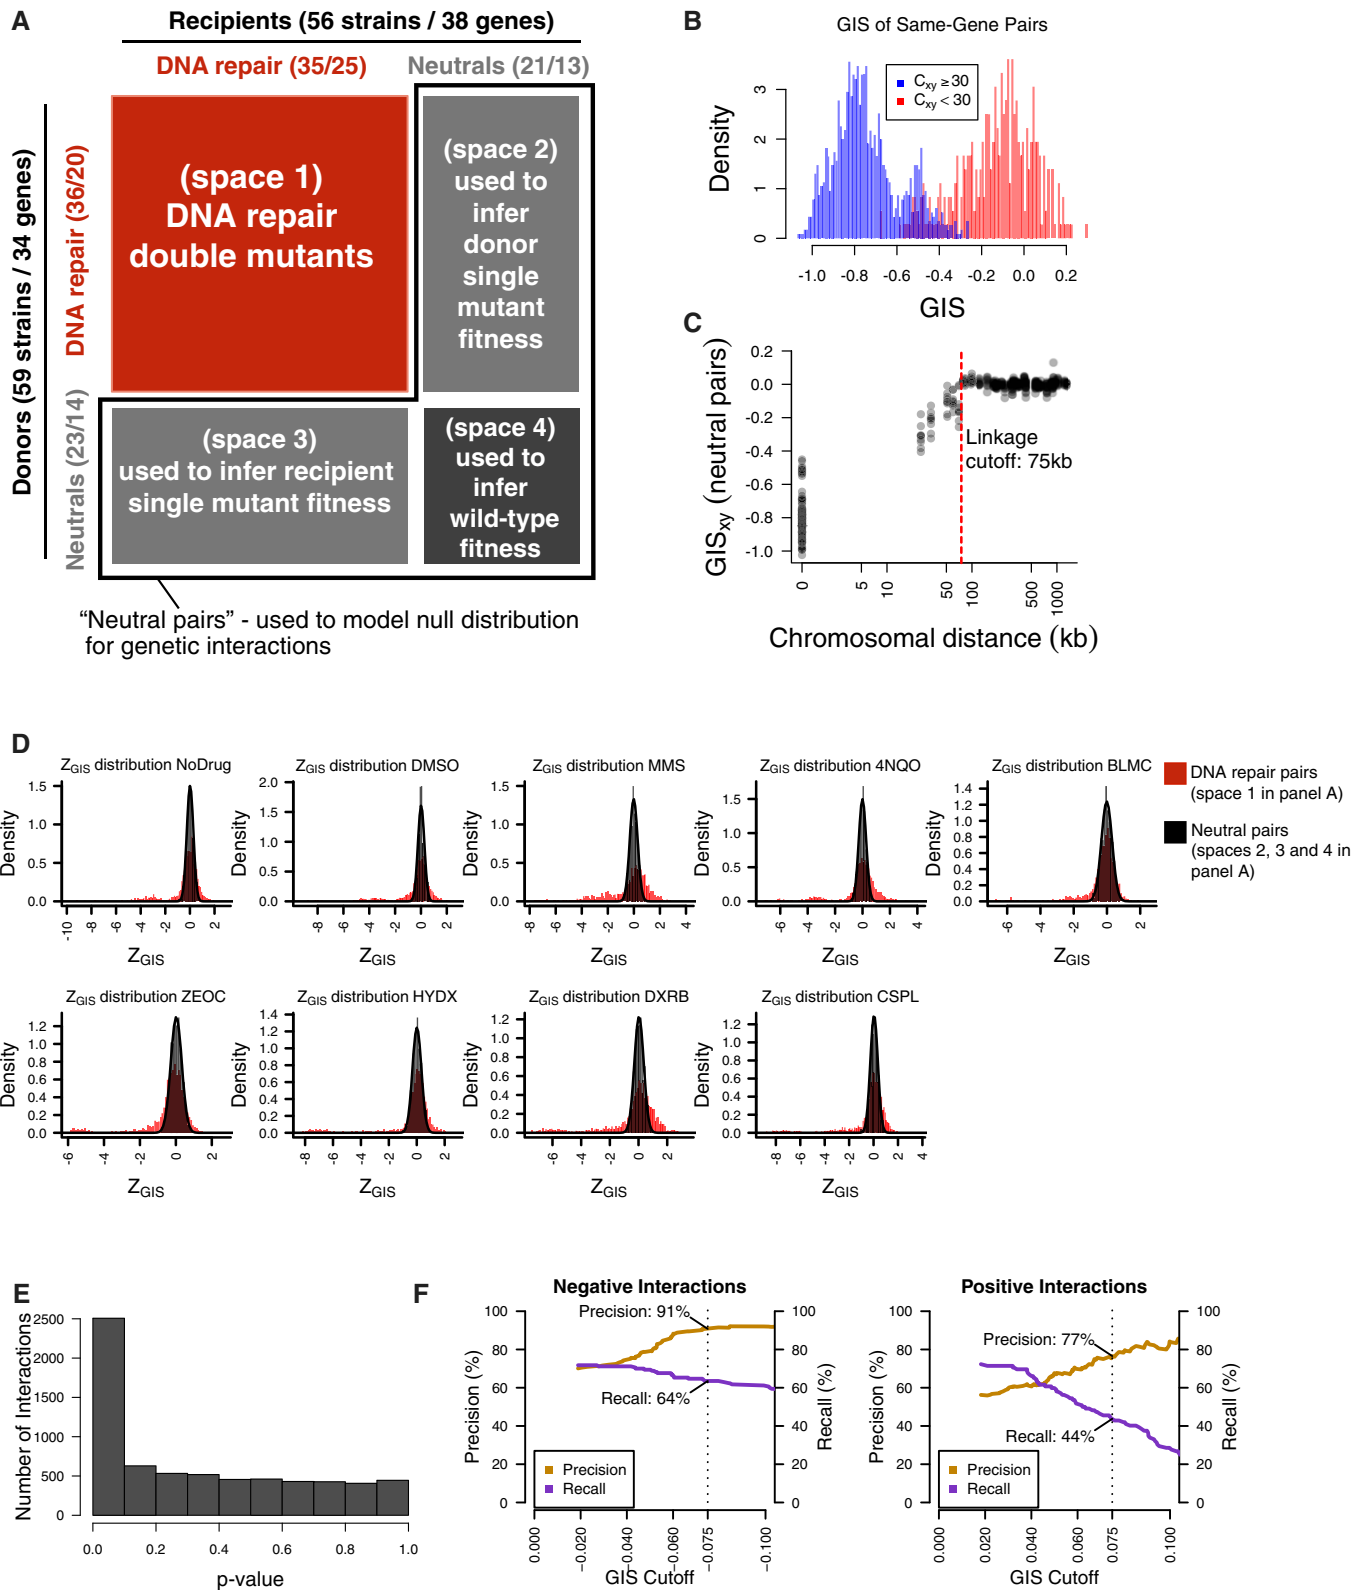

Figure EV4.

◀ **Figure EV4. Calling genetic interactions.**

- A Two collections of 59 donor strains (containing 34 unique knockouts) and 56 recipient strains (containing 38 unique gene knockouts) were crossed against each other in an all-by-all pooled format. Each strain contains a knockout at either a DNA repair gene or neutral locus. Double-knockout strains were divided into four spaces based on the types of genes knocked out. Numbers in parentheses represent the number of strains and unique gene knockouts, respectively.
- B Distribution of  $GIS$  amongst strain pairs containing the same gene, split by those which were well-measured from the heterozygous diploid stage ( $C_{xy} \geq 30$ ) and not well-measured from the same stage ( $C_{xy} < 30$ ). Non-well-measured strains (72 out of 3,305) were excluded from analysis, and  $GIS$  was re-calculated after their exclusion.
- C Distribution of  $GIS$  in strains representing linked neutral pairs. Using the  $GIS$  profiles, an empirical cutoff of 75 kbp (red dashed line) was chosen to classify strains with knockout pairs on the same chromosome as either linked or unlinked.  $GIS$  was then re-calculated based on this linkage criterion.
- D Distribution of  $Z_{GIS}$  calculated for DNA repair pairs (space 1 in panel A, red) and pairs involving well-measured and unlinked neutral genes (spaces 2, 3, and 4 in panel A, black).  $Z_{GIS}$  for pairs involving neutral genes were used to calculate a  $P$ -value.
- E Distribution of  $P$ -values calculated by the null distribution in (D).  $P$ -values were combined for multiple barcode replicates of each gene–gene pair and converted to FDR scores (see Materials and Methods). Barcode-level  $P$ -values are available in Table EV3, and gene-level FDR scores are available in Table EV4.
- F Benchmarks of BFG-GI with data from St Onge *et al* (2007) for strains containing a significant genetic interaction ( $FDR < 0.01$ ). Each graph shows precision and recall using the benchmark of St Onge *et al* (2007) as a function of an additional  $GIS$  effect-size cutoff (left = negative interaction performance; right = positive interaction performance). Overlay text indicates performance at  $|GIS| = 0.075$  (dashed lines), which was chosen as the effect-size threshold.



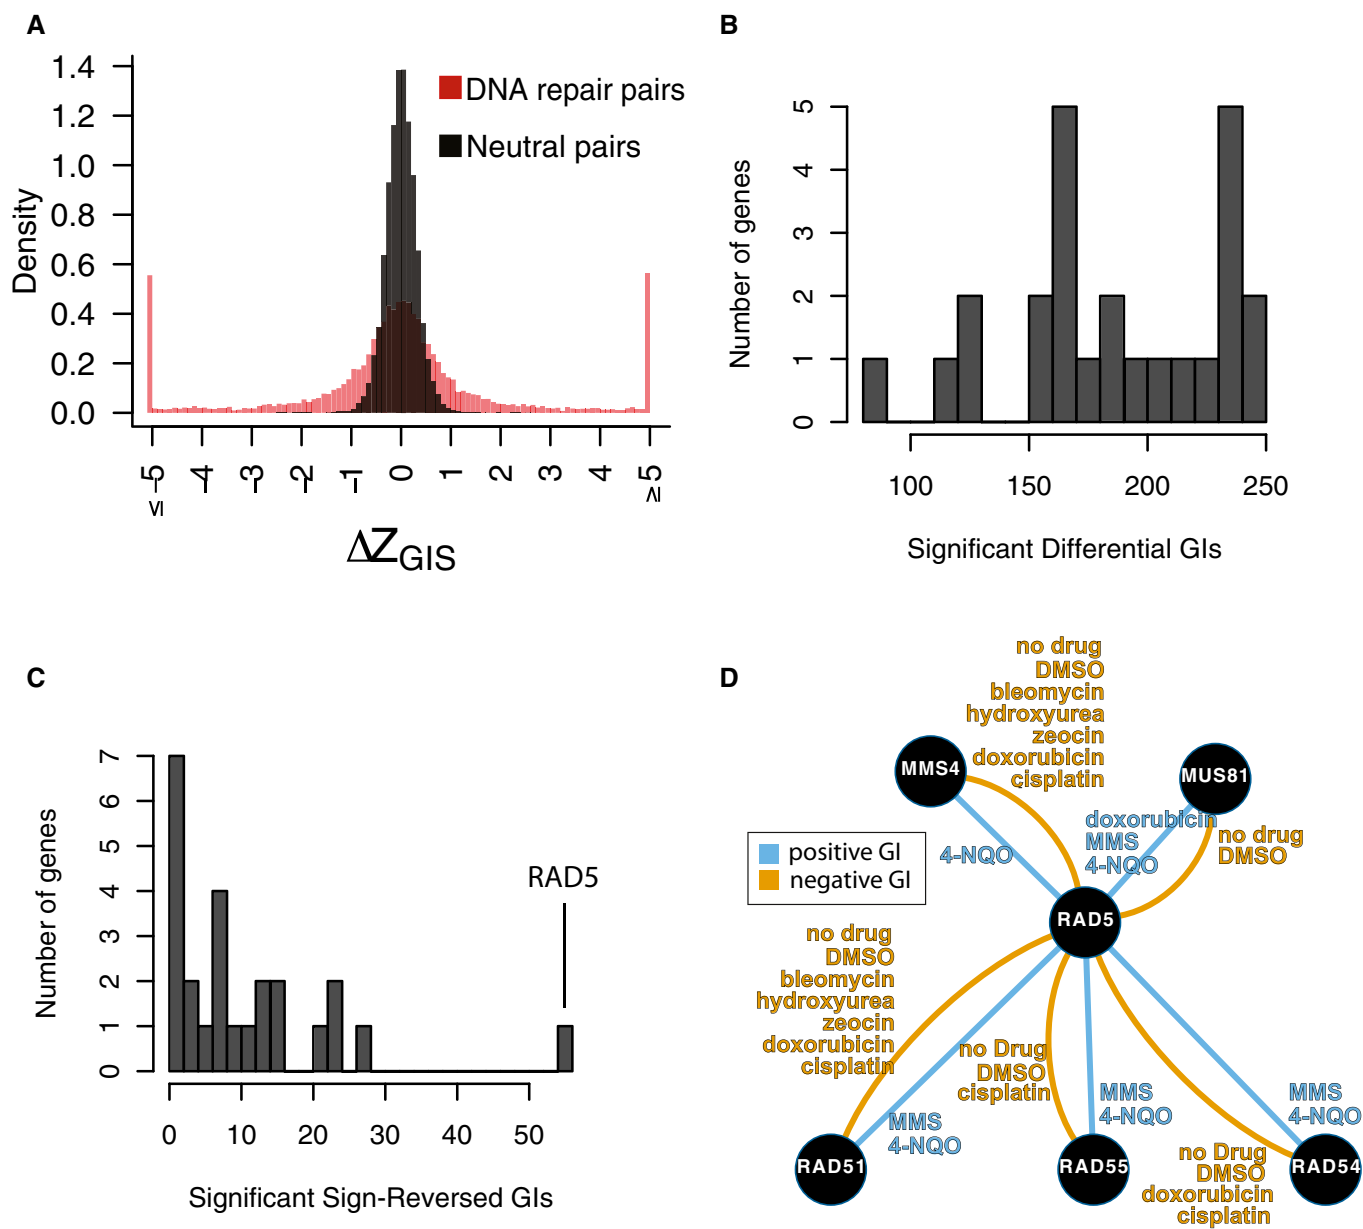

**Figure EV5. Calling differential genetic interactions.**

- A Distribution of  $\Delta Z_{GIS}$  for neutral pairs compared to DNA repair pairs. The distribution amongst neutral pairs was used to calculate a  $P$ -value for  $\Delta Z_{GIS}$  amongst DNA repair pairs, which was then converted to an FDR for each differential interaction (see Materials and Methods; Table EV6). An additional effect-size cutoff of  $|\Delta GIS| > 0.1$  was added to call differential genetic interactions in Fig 3 and Table EV5.
- B Distribution of significant differential genetic interaction calls per gene.
- C Distribution of significant differential genetic interaction calls involving a reversal of direction (i.e., from positive to negative or vice versa) by gene. *RAD5* is involved in 47 differential genetic interactions with a reversal of direction.
- D Summary of significant genetic interactions of *RAD5* with *MUS81*, *MMS4*, *RAD51*, *RAD54*, or *RAD55* in different conditions. Edges represent genetic interaction type and are labeled by conditions in which significant genetic interactions were found for the corresponding pair and direction.
